# Supplementary material
Source: PubMed Central journal article supplement (PMC6663659)
Supplement: NIHMS1519615-supplement-Supplemental_Digital_Content.pdf [file NIHMS1519615-supplement-Supplemental_Digital_Content.pdf]

## Supplemental Digital Appendix 1

### Final Survey, From a Multi-Institutional Study of Medical Students' Views on Health Care Reform and Professional Responsibility (N = 1,660), 2017

#### Start of Block: Section 1: Health Care Policy Issues

Part A: Please indicate your level of agreement with the following statements regarding health care policy issues by selecting the response that best represents your opinion.

|                                                                                                                                            | Strongly Disagree     | Somewhat disagree     | Neutral               | Somewhat agree        | Strongly agree        |
|--------------------------------------------------------------------------------------------------------------------------------------------|-----------------------|-----------------------|-----------------------|-----------------------|-----------------------|
| I understand the basic components of the Affordable Care Act.                                                                              | <input type="radio"/> |
| I support the Affordable Care Act.                                                                                                         | <input type="radio"/> |
| The Affordable Care Act will have a negative influence on my future career in medicine.                                                    | <input type="radio"/> |
| Health insurance should be provided to all, regardless of their ability to pay.                                                            | <input type="radio"/> |
| Access to health care is a privilege, not a right.                                                                                         | <input type="radio"/> |
| Addressing health care policy issues, as important as that may be, falls outside the scope of the professional obligations of a physician. | <input type="radio"/> |
| The threat of malpractice lawsuits substantially increases the overall cost of health care.                                                | <input type="radio"/> |

Part B: Please indicate your level of agreement with the following policies. Some of these policies have been enacted, while others are hypothetical scenarios.

I support...

|                                                                                 | Strongly disagree     | Somewhat disagree     | Neutral               | Somewhat agree        | Strongly agree        |
|---------------------------------------------------------------------------------|-----------------------|-----------------------|-----------------------|-----------------------|-----------------------|
| providing undocumented immigrants health insurance through government programs. | <input type="radio"/> |
| a single-payer health care system.                                              | <input type="radio"/> |
| increasing payments to physicians who provide primary care.                     | <input type="radio"/> |
| increasing payments to physicians who provide specialty care.                   | <input type="radio"/> |
| reducing funding for Medicaid.                                                  | <input type="radio"/> |
| requiring health insurance plans to cover contraceptive methods and education.  | <input type="radio"/> |
| requiring all Americans to have health insurance.                               | <input type="radio"/> |

Part C: We would like to ask you about particular policies that impact **health insurance coverage**. How **important or unimportant** do you think each of the following actions are for the US population?

Please note that the answer choices are different from the previous questions.

|                                                                                                                   | Very Unimportant      | Somewhat Unimportant  | Neither Important nor Unimportant | Somewhat Important    | Very Important        | Don't Know            |
|-------------------------------------------------------------------------------------------------------------------|-----------------------|-----------------------|-----------------------------------|-----------------------|-----------------------|-----------------------|
| Preventing insurance companies from denying coverage or charging higher prices based on pre-existing conditions.  | <input type="radio"/> | <input type="radio"/> | <input type="radio"/>             | <input type="radio"/> | <input type="radio"/> | <input type="radio"/> |
| Allowing young adults to remain on their family insurance plan until age 26.                                      | <input type="radio"/> | <input type="radio"/> | <input type="radio"/>             | <input type="radio"/> | <input type="radio"/> | <input type="radio"/> |
| Expanding Medicaid eligibility to \$20,783 for a single adult and to \$42,435 for a family of four.               | <input type="radio"/> | <input type="radio"/> | <input type="radio"/>             | <input type="radio"/> | <input type="radio"/> | <input type="radio"/> |
| Providing tax credits for small businesses that offer health insurance to employees.                              | <input type="radio"/> | <input type="radio"/> | <input type="radio"/>             | <input type="radio"/> | <input type="radio"/> | <input type="radio"/> |
| Capping the amount insurers can charge older customers for health insurance compared to younger customers at 3:1. | <input type="radio"/> | <input type="radio"/> | <input type="radio"/>             | <input type="radio"/> | <input type="radio"/> | <input type="radio"/> |

Part D: The following have been identified as **potential approaches** for future health reform. Do you **agree or disagree** that the following approaches would **improve** the health of the US population?

|                                                                           | Strongly disagree     | Somewhat disagree     | Neutral               | Somewhat agree        | Strongly agree        | Don't Know            |
|---------------------------------------------------------------------------|-----------------------|-----------------------|-----------------------|-----------------------|-----------------------|-----------------------|
| Increase the use of high deductible health plans.                         | <input type="radio"/> |
| Allow companies to sell health insurance across state lines.              | <input type="radio"/> |
| Create a public insurance option to compete with private insurance plans. | <input type="radio"/> |
| Expand Medicare to 55 to 64-year olds.                                    | <input type="radio"/> |

Part E: Please indicate your knowledge regarding the following statements by selecting the response that best represents your understanding.

The Affordable Care Act....

|                                                                                                                                                   | True                  | False                 |
|---------------------------------------------------------------------------------------------------------------------------------------------------|-----------------------|-----------------------|
| requires individuals to have health insurance or else pay a fine.                                                                                 | <input type="radio"/> | <input type="radio"/> |
| creates a new government-run insurance plan that anyone can purchase.                                                                             | <input type="radio"/> | <input type="radio"/> |
| expanded Medicaid in every state.                                                                                                                 | <input type="radio"/> | <input type="radio"/> |
| requires large businesses (more than 100 employees) to provide health insurance for their employees or else pay a fine.                           | <input type="radio"/> | <input type="radio"/> |
| includes an overhaul of tort reform law.                                                                                                          | <input type="radio"/> | <input type="radio"/> |
| defines benefits that private insurance companies must include in their insurance plans.                                                          | <input type="radio"/> | <input type="radio"/> |
| creates health insurance exchanges or marketplaces where small businesses and individuals can purchase insurance and compare prices and benefits. | <input type="radio"/> | <input type="radio"/> |
| prevents people from being denied coverage due to a pre-existing condition.                                                                       | <input type="radio"/> | <input type="radio"/> |

End of Block: Section 1: Health Care Policy Issues

## Start of Block: Section 2: Demographic Information

What is your age?

---

What is your sex?

- Male
- Female
- Other
- Prefer not to answer

Did you vote in the 2016 Presidential Election?

- Yes
- No

Are you Hispanic or Latino?

- Yes
- No
- Prefer not to answer

What is your race? (Select one or more responses)

- American Indian or Alaska Native
  - Asian (please specify) \_\_\_\_\_
  - Black or African American
  - Native Hawaiian or Other Pacific Islander
  - White
  - Other (please specify) \_\_\_\_\_
  - Prefer not to answer
- 

What is your medical school class?

- MS1
  - MS2
  - MS3
  - MS4
  - MD/PhD - Currently completing PhD
  - MD/MPH - Currently completing MPH
  - Other (please specify): \_\_\_\_\_
-

Which medical school do you attend?

- Emory School of Medicine
  - Icahn School of Medicine at Mount Sinai
  - Northwestern University Feinberg School of Medicine
  - University of California - Davis
  - University of Colorado School of Medicine
  - University of Minnesota School of Medicine - Duluth
  - University of Minnesota School of Medicine - Twin Cities
  - Yale School of Medicine
-

At this time, what is your intended specialty?

- Anesthesiology
  - Dermatology
  - Emergency Medicine
  - Family Medicine
  - General Surgery
  - Internal Medicine
  - Internal Medicine and Pediatrics
  - Neurology
  - Neurological Surgery
  - Obstetrics and Gynecology
  - Otolaryngology
  - Pathology
  - Pediatrics
  - Plastic Surgery
  - Psychiatry
  - Radiology
  - Urology
  - Unknown
  - Other (please specify) \_\_\_\_\_
-



What is your political ideology?

- Conservative
  - Somewhat conservative
  - Moderate
  - Somewhat liberal
  - Liberal
  - Other (please specify) \_\_\_\_\_
- 

In which state did you spend the majority of your developmental years?

---

What is your estimated level of education debt when you graduate from medical school?

- None
- Less than \$50,000
- \$50,000 - \$100,000
- \$100,000 - \$200,000
- \$200,000 - \$300,000
- \$300,000 or more

**End of Block: Section 2: Demographic Information**

---

## Supplemental Digital Appendix 2

### Percentages of Correct and Incorrect Responses for Medical Students Answering Eight Questions Assessing Knowledge of the ACA (N = 1,660), From a Multi-Institutional Study of Medical Students' Views on Health Care Reform and Professional Responsibility, 2017

|                                                                                                                                                   | True<br>N (%) <sup>a</sup> | False<br>N (%) <sup>a</sup> |
|---------------------------------------------------------------------------------------------------------------------------------------------------|----------------------------|-----------------------------|
| The Affordable Care Act . . .                                                                                                                     |                            |                             |
| requires individuals to have health insurance or else pay a fine.                                                                                 | 1584 (95.6) <sup>b</sup>   | 72 (4.4)                    |
| creates a new government-run insurance plan that anyone can purchase.                                                                             | 580 (35.1)                 | 1074 (64.9) <sup>b</sup>    |
| expanded Medicaid in every state.                                                                                                                 | 444 (26.9)                 | 1209 (73.1) <sup>b</sup>    |
| requires large businesses (more than 100 employees) to provide health insurance for their employees or else pay a fine.                           | 1526 (92.4) <sup>b</sup>   | 125 (7.6)                   |
| includes an overhaul of tort reform.                                                                                                              | 376 (23.1)                 | 1252 (76.9) <sup>b</sup>    |
| defines benefits that private insurance companies must include in their insurance plans.                                                          | 1391 (84.7) <sup>b</sup>   | 252 (15.3)                  |
| creates health insurance exchanges or marketplaces where small businesses and individuals can purchase insurance and compare prices and benefits. | 1556 (94.4) <sup>b</sup>   | 92 (5.6)                    |
| prevents people from being denied coverage due to a pre-existing condition.                                                                       | 1614 (97.8) <sup>b</sup>   | 37 (2.2)                    |

<sup>a</sup> Not all 1,660 students answered all questions, so totals vary. Percentages calculated from each question total.

<sup>b</sup> Indicates correct answer
